# Supplementary material
Source: publisher site journal article supplement (https://www.dovepress.com/article/454531)
Supplement: Supplementary file 1 [file get_supplementary_file.php]

Manuscript ID:454531

**ORIGINAL RESEARCH**

Li et al

**Correlation between growth differentiation factor-15 and peripheral neuropathy in patients with type 2 diabetes mellitus**

Yue Li1,2*, Yuhui Wang2,3*, Yonghong Cao1,2, Xinxiu Zhang1,2, Wu Dai1,2, Yiran Zhao1,2, Lei Zhang1,2, Xiaofang Han1,2

1Department of Endocrinology, Hefei Hospital Affiliated to Anhui Medical University, Hefei, P.R. China

2The Fifth Clinical College of Anhui Medical University, Hefei, China

3Department of Cardiology, Hefei Hospital Affiliated to Anhui Medical University, Hefei, P.R. China

Yue Li1,2*

Yuhui Wang2,3*

*These authors contributed equally to this work

Correspondence: Xiaofang Han, E-mail hxfanghf@sina.com

**Appendix**

**Definitions**

**Supplementary Appendix S1** A note on electrophysiologic diagnostics.

Electrophysiologic parameters: In clinical work, reference values for all neurophysiologic parameters routinely used in clinical practice have been collected from healthy subjects and published, and the measurements are compared with the reference values to determine whether the measurements are typical.1 Reference values for each nerve are mainly obtained from reviews and manuals related to nerve conduction studies,2 can also be extrapolated from clinical data.3,4 The simple approach is to use reference limits that are either the 95%–97.5% confidence limits or the mean ± 2 standard deviations. However, many of the parameters measured are influenced by multiple independent variables (age, gender, height, and temperature), which cannot easily be taken into consideration with simple reference limits. Given the complexity and specialized nature of the work, two experienced electrophysiologists assisted in this part of the project.

**Supplementary Appendix S2** Definition of T2DM.

T2DM was defined based on 1999 WHO diagnostic criteria: fasting plasma glucose (FPG)≥7.0 mmol/Land/or a 2-h plasma glucose concentration ≥11.1mmol/L on an oral glucose tolerance test (OGTT). 5

**Supplementary Appendix S3** Definition of DPN.

DPN was defined using a three-level hierarchy of clinical findings and nerve conduction results: 6

1. Clinically evident DPN, defined as at least two positive findings among sensory symptoms, signs, or reflex abnormalities consistent with a distal symmetrical polyneuropathy.
2. Abnormal nerve conduction studies are defined by at least one abnormal nerve attribute (amplitude, latency, F-wave, or nerve conduction velocity) in two or more nerves among the median, peroneal, and sural nerves.
3. Confirmed DPN, defined as clinically evident DPN and abnormal nerve conduction studies as described above.

**Supplementary Appendix S4** Calculations and notes on HOMA-IR.

Homeostasis model assessment of insulin resistance (HOMA-IR) index calculated from glucose and insulin values to determine the degree of existing insulin resistance using the following formula: HOMA-IR = fasting plasma glucose (mmol/L) × fasting serum insulin (μU/mL)/22.5.

Linear regression analysis models

**Supplementary Table 1**  Liner regression models for the association of GDF-15 and sensory NCV

| Variable | Univariate analysis | | VIF | Multivariate analysis | |
| --- | --- | --- | --- | --- | --- |
| OR  (95% CI) | p-value | OR  (95% CI) | p-value |
| GDF-15  (100 pg/mL) | -0.30  (-0.48, -0.13) | 0.001 | 1.71 | -0.31  (-0.48, -0.13) | 0.001 |
| Age (years) | 0.05  (-0.01, 0.11) | 0.107 | 1.53 |  |  |
| Male | 0.79  (-0.56, 2.14) | 0.251 | 1.65 |  |  |
| Duration (years) | 0.09  (-0.01, 0.2) | 0.087 | 1.38 |  |  |
| BMI (kg/m2) | -0.13  (-0.33, 0.06) | 0.172 | 1.67 |  |  |
| Hypertension | 0.69  (-0.65, 2.02) | 0.310 | 1.33 |  |  |
| Metformin | 1.39  (0.05, 2.73) | 0.042 | 1.15 | 1.47  (0.18, 2.77) | 0.026 |
| TG (mmol/L) | -0.07  (-0.18, 0.03) | 0.184 | 2.66 |  |  |
| TC (mmol/L) | 0.1  (-0.44, 0.64) | 0.713 | 5.88 |  |  |
| HDL (mmol/L) | -0.06  (-1.39, 1.28) | 0.935 | 3.09 |  |  |
| LDL (mmol/L) | 0.26  (-0.43, 0.95) | 0.457 | 5.20 |  |  |
| Scr (µmol/L) | 0.01  (-0.01, 0.04) | 0.302 | 1.77 |  |  |
| UA (µmol/L) | 0  (-0.01, 0.01) | 0.789 | 2.16 |  |  |
| HbA1c (%) | 0.06  (-0.19, 0.31) | 0.637 | 1.42 |  |  |
| HOMA-IR | 0(-0.04, 0.03) | 0.824 | 1.13 |  |  |
| ACR (mg/g) | 0(0, 0) | 0.985 | 2.03 |  |  |
| FBG (mmol/L) | -0.22  (-0.47, 0.04) | 0.100 | 1.17 |  |  |

**Abbreviations:** GDF-15, growth differentiation factor-15; BMI, body mass index; TG, triglyceride; TC, total cholesterol; HDL, high-density lipoprotein; LDL, low-density lipoprotein; Scr, serum creatinine; UA, serum uric acid; HbA1c, glycosylated hemoglobin; HOMA-IR, homeostasis model assessment of insulin resistance; ACR, urine albumin/creatinine ratio; FBG, fasting blood glucose.

**Supplementary Table 2** Liner regression models for the association of GDF-15 and motor NCV

| Variable | Univariate analysis | | VIF | Multivariate analysis | |
| --- | --- | --- | --- | --- | --- |
| OR  (95% CI) | p-value | OR  (95% CI) | p-value |
| GDF-15  (100 pg/mL) | -0.29  (-0.45, -0.12) | 0.001 | 1.71 | -0.29  (-0.45, -0.12) | 0.001 |
| Age (years) | -0.04  (-0.1, 0.01) | 0.129 | 1.53 |  |  |
| Male | -0.73  (-2.01, 0.56) | 0.265 | 1.65 |  |  |
| Duration (years) | 0  (-0.1, 0.1) | 0.966 | 1.38 |  |  |
| BMI (kg/m2) | -0.12  (-0.31, 0.06) | 0.190 | 1.67 |  |  |
| Hypertension | -1.2  (-2.46, 0.05) | 0.060 | 1.33 |  |  |
| Metformin | -0.47  (-1.75, 0.82) | 0.473 | 1.15 |  |  |
| TG (mmol/L) | 0.02  (-0.08, 0.12) | 0.711 | 2.66 |  |  |
| TC (mmol/L) | 0.10  (-0.41, 0.61) | 0.709 | 5.88 |  |  |
| HDL (mmol/L) | 0.23  (-1.04, 1.5) | 0.719 | 3.09 |  |  |
| LDL (mmol/L) | 0  (-0.66, 0.66) | 0.996 | 5.2 |  |  |
| Scr (µmol/L) | -0.02  (-0.04, 0.01) | 0.158 | 1.77 |  |  |
| UA (µmol/L) | 0  (-0.01, 0) | 0.093 | 2.16 |  |  |
| HbA1c (%) | -0.16  (-0.4, 0.07) | 0.176 | 1.42 |  |  |
| HOMA-IR | -0.01  (-0.05, 0.02) | 0.526 | 1.13 |  |  |
| ACR (mg/g) | 0  (-0.01, 0) | 0.211 | 2.03 |  |  |
| FBG (mmol/L) | -0.01  (-0.25, 0.24) | 0.959 | 1.17 |  |  |

**Abbreviations:** GDF-15, growth differentiation factor-15; BMI, body mass index; TG, triglyceride; TC, total cholesterol; HDL, high-density lipoprotein; LDL, low-density lipoprotein; Scr, serum creatinine; UA, serum uric acid; HbA1c, glycosylated hemoglobin; HOMA-IR, homeostasis model assessment of insulin resistance; ACR, urine albumin/creatinine ratio; FBG, fasting blood glucose.

**Supplementary Table 3** Liner regression models for the association of GDF-15 and sensory latencies

| Variable | Univariate analysis | | VIF | Multivariate analysis | |
| --- | --- | --- | --- | --- | --- |
| OR  (95% CI) | p-value | OR  (95% CI) | p-value |
| GDF-15  (100 pg/mL) | 0.02  (0.01, 0.03) | <0.001 | 1.71 | 0.02  (0.01, 0.03) | 0.004 |
| Age (years) | 0  (0, 0) | 0.858 | 1.53 |  |  |
| Male | -0.04  (-0.12, 0.05) | 0.411 | 1.65 |  |  |
| Duration (years) | 0  (-0.01, 0.01) | 0.803 | 1.38 |  |  |
| BMI (kg/m2) | 0.01  (0, 0.02) | 0.125 | 1.67 |  |  |
| Hypertension | 0.01  (-0.07, 0.1) | 0.755 | 1.33 |  |  |
| Metformin | -0.03  (-0.12, 0.06) | 0.531 | 1.15 |  |  |
| TG (mmol/L) | 0.01  (0, 0.01) | 0.046 | 2.66 | 0  (-0.01, 0.01) | 0.456 |
| TC (mmol/L) | 0.01  (-0.02, 0.05) | 0.528 | 5.88 |  |  |
| HDL (mmol/L) | 0.10  (0.01, 0.18) | 0.023 | 3.09 | 0.07  (-0.03, 0.18) | 0.165 |
| LDL (mmol/L) | 0.01  (-0.04, 0.05) | 0.740 | 5.20 |  |  |
| Scr (µmol/L) | 0  (0, 0) | 0.787 | 1.77 |  |  |
| UA (µmol/L) | 0  (0, 0) | 0.014 | 2.16 | 0  (0, 0) | 0.636 |
| HbA1c (%) | 0.02  (0, 0.03) | 0.033 | 1.42 | 0.01  (-0.01, 0.02) | 0.312 |
| HOMA-IR | 0  (0, 0) | 0.954 | 1.13 |  |  |
| ACR (mg/g) | 0  (0, 0) | 0.065 | 2.03 |  |  |
| FBG (mmol/L) | 0  (-0.01, 0.02) | 0.679 | 1.17 |  |  |

**Abbreviations:** GDF-15, growth differentiation factor-15; BMI, body mass index; TG, triglyceride; TC, total cholesterol; HDL, high-density lipoprotein; LDL, low-density lipoprotein; Scr, serum creatinine; UA, serum uric acid; HbA1c, glycosylated hemoglobin; HOMA-IR, homeostasis model assessment of insulin resistance; ACR, urine albumin/creatinine ratio; FBG, fasting blood glucose.

**Supplementary Table 4** Liner regression models for the association of GDF-15 and motor latencies

| Variable | Univariate analysis | | VIF | Multivariate analysis | |
| --- | --- | --- | --- | --- | --- |
| OR  (95% CI) | p-value | OR  (95% CI) | p-value |
| GDF-15  (100 pg/mL) | 0.07  (0.05, 0.10) | <0.001 | 1.71 | 0.06  (0.03, 0.09) | <0.001 |
| Age (years) | 0.01  (0.01, 0.02) | 0.001 | 1.53 | 0.01  (0, 0.02) | 0.060 |
| Male | 0.09  (-0.11, 0.29) | 0.393 | 1.65 |  |  |
| Duration (years) | 0.01  (0, 0.03) | 0.171 | 1.38 |  |  |
| BMI (kg/m2) | 0.03  (0, 0.05) | 0.079 | 1.67 |  |  |
| Hypertension | 0.25  (0.06, 0.45) | 0.011 | 1.33 | 0.19  (0.01, 0.38) | 0.040 |
| Metformin | 0.14  (-0.06, 0.34) | 0.157 | 1.15 |  |  |
| TG (mmol/L) | 0  (-0.02, 0.01) | 0.664 | 2.66 |  |  |
| TC (mmol/L) | -0.01  (-0.09, 0.07) | 0.870 | 5.88 |  |  |
| HDL (mmol/L) | -0.03  (-0.22, 0.17) | 0.802 | 3.09 |  |  |
| LDL (mmol/L) | -0.03  (-0.13, 0.08) | 0.631 | 5.20 |  |  |
| Scr (µmol/L) | 0  (0, 0.01) | 0.379 | 1.77 |  |  |
| UA (µmol/L) | 0  (0, 0) | 0.004 | 2.16 | 0  (0, 0) | 0.662 |
| HbA1c (%) | 0.06  (0.02, 0.09) | 0.003 | 1.42 | 0.01  (-0.03, 0.05) | 0.575 |
| HOMA-IR | 0  (-0.01, 0) | 0.795 | 1.13 |  |  |
| ACR (mg/g) | 0  (0, 0) | <0.001 | 2.03 | 0  (0, 0) | 0.392 |
| FBG (mmol/L) | -0.02  (-0.05, 0.02) | 0.440 | 1.17 |  |  |

**Abbreviations:** GDF-15, growth differentiation factor-15; BMI, body mass index; TG, triglyceride; TC, total cholesterol; HDL, high-density lipoprotein; LDL, low-density lipoprotein; Scr, serum creatinine; UA, serum uric acid; HbA1c, glycosylated hemoglobin; HOMA-IR, homeostasis model assessment of insulin resistance; ACR, urine albumin/creatinine ratio; FBG, fasting blood glucose.

**Supplementary Table 5** Liner regression models for the association of GDF-15 and sensory Amp

| Variable | Univariate analysis | | VIF | Multivariate analysis | |
| --- | --- | --- | --- | --- | --- |
| OR  (95% CI) | p-value | OR  (95% CI) | p-value |
| GDF-15  (100 pg/mL) | -0.21  (-0.48, 0.06) | 0.128 | 1.71 | -0.23  (-0.49, 0.04) | 0.090 |
| Age (years) | 0.02  (-0.07, 0.11) | 0.626 | 1.53 |  |  |
| Male | 0.72  (-1.31, 2.75) | 0.486 | 1.65 |  |  |
| Duration (years) | 0.09  (-0.07, 0.25) | 0.248 | 1.38 |  |  |
| BMI (kg/m2) | 0.06  (-0.23, 0.35) | 0.670 | 1.67 |  |  |
| Hypertension | 2.22  (0.25, 4.19) | 0.027 | 1.33 | 1.69  (-0.38, 3.76) | 0.110 |
| Metformin | 0.15  (-1.87, 2.18) | 0.881 | 1.15 |  |  |
| TG (mmol/L) | -0.04  (-0.2, 0.12) | 0.655 | 2.66 |  |  |
| TC (mmol/L) | 0.08  (-0.73, 0.88) | 0.851 | 5.88 |  |  |
| HDL (mmol/L) | -0.60  (-2.6, 1.4) | 0.556 | 3.09 |  |  |
| LDL (mmol/L) | -0.19  (-1.22, 0.85) | 0.723 | 5.20 |  |  |
| Scr (µmol/L) | 0.05  (0, 0.09) | 0.028 | 1.77 | 0.04  (-0.01, 0.08) | 0.101 |
| UA (µmol/L) | 0  (0, 0.01) | 0.314 | 2.16 |  |  |
| HbA1c (%) | -0.14  (-0.52, 0.23) | 0.450 | 1.42 |  |  |
| HOMA-IR | -0.01  (-0.07, 0.05) | 0.763 | 1.13 |  |  |
| ACR (mg/g) | 0  (-0.01, 0.01) | 0.834 | 2.03 |  |  |
| FBG (mmol/L) | -0.18  (-0.57, 0.21) | 0.360 | 1.17 |  |  |

**Abbreviations:** GDF-15, growth differentiation factor-15; BMI, body mass index; TG, triglyceride; TC, total cholesterol; HDL, high-density lipoprotein; LDL, low-density lipoprotein; Scr, serum creatinine; UA, serum uric acid; HbA1c, glycosylated hemoglobin; HOMA-IR, homeostasis model assessment of insulin resistance; ACR, urine albumin/creatinine ratio; FBG, fasting blood glucose.

**Supplementary Table 6** Liner regression models for the association of GDF-15 and motor Amp

| Variable | Univariate analysis | | VIF | Multivariate analysis | |
| --- | --- | --- | --- | --- | --- |
| OR  (95% CI) | p-value | OR  (95% CI) | p-value |
| GDF-15  (100 pg/mL) | -0.18  (-0.27, -0.08) | <0.001 | 1.71 | -0.14  (-0.25, -0.03) | 0.012 |
| Age (years) | -0.06  (-0.09, -0.03) | <0.001 | 1.53 | -0.05  (-0.08, -0.02) | 0.001 |
| Male | 0.70  (-0.03, 1.43) | 0.059 | 1.65 |  |  |
| Duration (years) | -0.06  (-0.11, 0) | 0.058 | 1.38 |  |  |
| BMI (kg/m2) | -0.13  (-0.23, -0.03) | 0.014 | 1.67 | -0.05  (-0.17, 0.06) | 0.371 |
| Hypertension | -0.82  (-1.53, -0.1) | 0.025 | 1.33 | -0.45  (-1.15, 0.25) | 0.207 |
| Metformin | -0.30  (-1.04, 0.44) | 0.421 | 1.15 |  |  |
| TG (mmol/L) | 0.04  (-0.02, 0.1) | 0.183 | 2.66 |  |  |
| TC (mmol/L) | 0.10  (-0.19, 0.39) | 0.496 | 5.88 |  |  |
| HDL (mmol/L) | 0.50  (-0.23, 1.22) | 0.177 | 3.09 |  |  |
| LDL (mmol/L) | 0.17  (-0.2, 0.55) | 0.368 | 5.20 |  |  |
| Scr (µmol/L) | -0.01  (-0.02, 0.01) | 0.317 | 1.77 |  |  |
| UA (µmol/L) | 0  (-0.01, 0) | 0.040 | 2.16 | 0  (0, 0) | 0.796 |
| HbA1c (%) | -0.08  (-0.22, 0.05) | 0.235 | 1.42 |  |  |
| HOMA-IR | -0.01  (-0.03, 0.01) | 0.273 | 1.13 |  |  |
| ACR (mg/g) | 0  (0, 0) | 0.055 | 2.03 |  |  |
| FBG (mmol/L) | 0.11  (-0.03, 0.25) | 0.139 | 1.17 |  |  |

**Abbreviations:** GDF-15, growth differentiation factor-15; BMI, body mass index; TG, triglyceride; TC, total cholesterol; HDL, high-density lipoprotein; LDL, low-density lipoprotein; Scr, serum creatinine; UA, serum uric acid; HbA1c, glycosylated hemoglobin; HOMA-IR, homeostasis model assessment of insulin resistance; ACR, urine albumin/creatinine ratio; FBG, fasting blood glucose.

**Restricted cubic spline**

**Supplementary Table 7** Logistic regression models for the association of GDF-15 and DPN(before the turning point:GDF-15 < 914.28 pg/ml)

| Variable | Univariate analysis | | VIF | Multivariate analysis | |
| --- | --- | --- | --- | --- | --- |
| OR  (95% CI) | p-value | OR  (95% CI) | p-value |
| GDF-15  (100 pg/mL) | 1.39  (1.17, 1.67) | <0.001 | 1.10 | 1.34  (1.12, 1.64) | 0.002 |
| Age (years) | 1.03  (1, 1.07) | 0.058 | 1.47 |  |  |
| Male | 1.06  (0.53, 2.1) | 0.877 | 2.14 |  |  |
| Duration (years) | 1.05  (0.99, 1.11) | 0.125 | 1.24 |  |  |
| BMI (kg/m2) | 1.1  (0.97, 1.25) | 0.141 | 1.48 |  |  |
| Hypertension | 1.22  (0.62, 2.41) | 0.565 | 1.54 |  |  |
| Metformin | 0.69  (0.34, 1.37) | 0.289 | 1.13 |  |  |
| TG (mmol/L) | 1.25  (1, 1.71) | 0.147 | 1.99 |  |  |
| TC (mmol/L) | 1.17  (0.89, 1.57) | 0.268 | 8.58 |  |  |
| HDL (mmol/L) | 1.51  (0.74, 3.71) | 0.298 | 2.31 |  |  |
| LDL (mmol/L) | 1.14  (0.8, 1.63) | 0.479 | 5.96 |  |  |
| Scr (µmol/L) | 1  (0.98, 1.01) | 0.804 | 2.59 |  |  |
| UA (µmol/L) | 1  (1, 1.01) | 0.030 | 1.61 | 1  (1.00, 1.01) | 0.248 |
| HbA1c (%) | 1.15  (0.97, 1.36) | 0.105 | 1.27 |  |  |
| HOMA-IR | 0.99  (0.94, 1.01) | 0.474 | 1.09 |  |  |
| ACR (mg/g) | 1.02  (1.01, 1.03) | 0.002 | 1.45 | 1.01  (1.00, 1.03) | 0.018 |
| FBG (mmol/L) | 1.07  (0.93, 1.24) | 0.337 | 1.23 |  |  |

**Abbreviations:** GDF-15, growth differentiation factor-15; BMI, body mass index; TG, triglyceride; TC, total cholesterol; HDL, high-density lipoprotein; LDL, low-density lipoprotein; Scr, serum creatinine; UA, serum uric acid; HbA1c, glycosylated hemoglobin; HOMA-IR, homeostasis model assessment of insulin resistance; ACR, urine albumin/creatinine ratio; FBG, fasting blood glucose.

**References**

1. Stålberg E, van Dijk H, Falck B, et al. Standards for quantification of EMG and neurography. *Clinical neurophysiology : official journal of the International Federation of Clinical Neurophysiology.* 2019;130(9):1688-1729. doi: [10.1016/j.clinph.2019.05.008](https://pubmed.ncbi.nlm.nih.gov/31213353/)

2. Buschbacher RM. Body mass index effect on common nerve conduction study measurements. *Muscle & nerve.* 1998;21(11):1398-1404. doi: [10.1002/（sici）1097-4598（199811）21：11<1398：：aid-mus6>3.0.co;2-4](https://doi.org/10.1002/(sici)1097-4598(199811)21:11%3C1398::aid-mus6%3E3.0.co;2-4)

3. Jabre JF, Pitt MC, Deeb J, et al. E-norms: a method to extrapolate reference values from a laboratory population. *Journal of clinical neurophysiology : official publication of the American Electroencephalographic Society*. 2015;32(3):265-270. doi: [10.1097/WNP.00000000000000161](https://doi.org/10.1097/wnp.0000000000000161)

4. Nandedkar SD, Sanders DB, Hobson-Webb LD, et al. The extrapolated reference values procedure: Theory, algorithm, and results in patients and control subjects. *Muscle & nerve*. 2018;57(1):90-95. doi: [10.1002/mus.25606](https://doi.org/10.1002/mus.25606)

5. *Consultation W. Definition, Diagnosis and Classification of Diabetes Mellitus and Its Complications*. part 1999.

6. Martin CL, Albers JW, Pop-Busui R. Neuropathy and related findings in the diabetes control and complications trial/epidemiology of diabetes interventions and complications study. *Diabetes care*. 2014;37(1):31-38. doi:[10.2337/dc13-2114](https://doi.org/10.2337/dc13-2114)
